# Supplementary material
Source: HighWire-hosted journal article supplement (https://bjo.bmj.com/content/104/12/1774)
Supplement: inline-supplementary-material-1 [file inline-supplementary-material-1.pdf]

Supplementary table 1. Associations between different baseline characteristics and the quartiles of cheese consumption.

| Characteristics                      |            | Q1        | Q2         | Q3         | Q4         | P value |
|--------------------------------------|------------|-----------|------------|------------|------------|---------|
| Age (years)                          |            |           |            |            |            | 0.76    |
| 45-55                                | 2649(32.6) | 292(30.0) | 953(34.2)  | 400(30.8)  | 1004(32.8) |         |
| 56-65                                | 5473(67.4) | 681(70.0) | 1837(65.8) | 899(69.2)  | 2056(67.2) |         |
| Gender                               |            |           |            |            |            | 0.02    |
| Male                                 | 4525(55.7) | 586(60.2) | 1553(55.7) | 709(54.6)  | 1677(54.8) |         |
| Female                               | 3597(44.3) | 387(39.8) | 1237(44.3) | 590(45.4)  | 1383(45.2) |         |
| Household Income (AUD/years)         |            |           |            |            |            | 0.60    |
| <20000                               | 1759(21.7) | 252(25.9) | 581(20.8)  | 260(20.0)  | 666(21.8)  |         |
| ≥20000-40000                         | 1344(16.5) | 144(14.8) | 449(16.1)  | 220(16.9)  | 531(17.4)  |         |
| ≥40000-70000                         | 1619(19.9) | 175(18.0) | 559(20.0)  | 273(21.0)  | 612(20.0)  |         |
| ≥70000                               | 1956(24.1) | 196(20.1) | 727(26.1)  | 319(24.6)  | 714(23.3)  |         |
| Missing                              | 1444(17.8) | 206(21.2) | 474(17.0)  | 227(17.5)  | 537(17.5)  |         |
| Education level                      |            |           |            |            |            | 0.02    |
| Low (no qualifications)              | 1096(13.5) | 174(17.9) | 382(13.7)  | 158(12.2)  | 382(12.5)  |         |
| Medium (certificate/diploma/trade)   | 5289(65.1) | 595(61.2) | 1817(65.1) | 856(65.9)  | 2021(66.0) |         |
| High (university)                    | 1655(20.4) | 195(20.0) | 556(19.9)  | 277(21.3)  | 627(20.5)  |         |
| Missing                              | 82(1.0)    | 9(0.9)    | 35(1.3)    | 8(0.6)     | 30(1.0)    |         |
| Body mass index (kg/m <sup>2</sup> ) |            |           |            |            |            | 0.04    |
| Underweight and normal weight        | 1092(13.4) | 178(18.3) | 362(13.0)  | 155(11.9)  | 397(13.0)  |         |
| Overweight                           | 2496(30.7) | 302(31.0) | 832(29.8)  | 408(31.4)  | 954(31.2)  |         |
| Obese                                | 4039(49.7) | 440(45.2) | 1426(51.1) | 656(50.5)  | 1517(49.6) |         |
| Missing                              | 495(6.1)   | 53(5.4)   | 170(6.1)   | 80(6.2)    | 192(6.3)   |         |
| Hypertension                         |            |           |            |            |            | 0.11    |
| Yes                                  | 4791(59.0) | 547(56.2) | 1637(58.7) | 788(60.7)  | 1819(59.4) |         |
| No                                   | 3331(41.0) | 426(43.8) | 1153(41.3) | 511(39.3)  | 1241(40.6) |         |
| Cardiovascular disease               |            |           |            |            |            | 0.41    |
| Yes                                  | 1490(18.3) | 183(18.8) | 519(18.6)  | 241(18.6)  | 547(17.9)  |         |
| No                                   | 6632(81.7) | 790(81.2) | 2271(81.4) | 1058(81.4) | 2513(82.1) |         |
| Insulin treatment                    |            |           |            |            |            | 0.05    |
| Yes                                  | 1098(13.5) | 116(11.9) | 364(13.0)  | 184(14.2)  | 434(14.2)  |         |
| No                                   | 7024(86.5) | 857(88.1) | 2426(87.0) | 1115(85.8) | 2626(85.8) |         |
| Diabetes duration (years)            |            |           |            |            |            | 0.57    |
| 0-5                                  | 3536(43.5) | 436(44.8) | 1203(43.1) | 571(44.0)  | 1326(43.3) |         |
| ≥5-10                                | 2020(24.9) | 218(22.4) | 714(25.6)  | 339(26.1)  | 749(24.5)  |         |
| ≥10-20                               | 1678(20.7) | 210(21.6) | 593(21.3)  | 264(20.3)  | 611(20.0)  |         |
| ≥20                                  | 526(6.5)   | 59(6.1)   | 155(5.6)   | 76(5.9)    | 236(7.7)   |         |
| Missing                              | 362(4.5)   | 50(5.1)   | 125(4.5)   | 49(3.8)    | 138(4.5)   |         |
| Family history of diabetes           |            |           |            |            |            | 0.80    |
| Yes                                  | 4257(52.4) | 506(52.0) | 1464(52.5) | 677(52.1)  | 1610(52.6) |         |
| No                                   | 3865(47.6) | 467(48.0) | 1326(47.5) | 622(47.9)  | 1450(47.4) |         |
| Current smoker                       |            |           |            |            |            | 0.76    |
| Yes                                  | 7270(89.5) | 869(89.3) | 2513(90.1) | 1146(88.2) | 2742(89.6) |         |
| No                                   | 848(10.4)  | 104(10.7) | 276(9.9)   | 151(11.6)  | 317(10.4)  |         |
| Missing                              | 3(0.0)     |           | 1(0.0)     | 1(0.1)     | 1(0.0)     |         |
| Alcohol drinker                      |            |           |            |            |            | <0.001  |
| Yes                                  | 4421(54.4) | 442(45.4) | 1538(55.1) | 717(55.2)  | 1724(56.3) |         |
| No                                   | 3683(45.3) | 528(54.3) | 1243(44.6) | 579(44.6)  | 1333(43.6) |         |
| Missing                              | 18(0.2)    | 3(0.3)    | 9(0.3)     | 3(0.2)     | 3(0.1)     |         |
| Physical activity (sessions/week)    |            |           |            |            |            | <0.001  |
| <5                                   | 222(2.7)   | 31(3.2)   | 84(3.0)    | 25(1.9)    | 82(2.7)    |         |
| ≥5-9                                 | 2031(25.0) | 238(24.5) | 754(27.0)  | 331(25.5)  | 708(23.1)  |         |

|         |            |           |           |           |           |
|---------|------------|-----------|-----------|-----------|-----------|
| ≥9–14   | 2446(30.1) | 291(29.9) | 874(31.3) | 383(29.5) | 898(29.3) |
| ≥14     | 1682(20.7) | 201(20.7) | 534(19.1) | 301(23.2) | 646(21.1) |
| Missing | 1741(21.4) | 212(21.8) | 544(19.5) | 259(19.9) | 726(23.7) |

The quartiles of cheese consumption were as follows: Q1: 0; Q2:1; Q3: 2,3; Q4: ≥4.

Supplementary table 2. Associations between different baseline characteristics and the consumption of whole-meal bread.

| Characteristics                      | Q1         | Q2         | Q3         | Q4         | P value    |
|--------------------------------------|------------|------------|------------|------------|------------|
| Age (years)                          |            |            |            |            | <0.001     |
| 45-55                                | 2649(32.6) | 669(37.1)  | 652(34.4)  | 735(32.0)  | 593(27.8)  |
| 56-65                                | 5473(67.4) | 1132(62.9) | 1241(65.6) | 1561(68.0) | 1539(72.2) |
| Gender                               |            |            |            |            | <0.001     |
| Male                                 | 4525(55.7) | 1011(56.1) | 939(49.6)  | 1176(51.2) | 1399(65.6) |
| Female                               | 3597(44.3) | 790(43.9)  | 954(50.4)  | 1120(48.8) | 733(34.4)  |
| Household Income (AUD/years)         |            |            |            |            | 0.74       |
| <20000                               | 1759(21.7) | 443(24.6)  | 392(20.7)  | 453(19.7)  | 471(22.1)  |
| ≥20000-40000                         | 1344(16.5) | 289(16.0)  | 286(15.1)  | 375(16.3)  | 394(18.5)  |
| ≥40000-70000                         | 1619(19.9) | 355(19.7)  | 352(18.6)  | 487(21.2)  | 425(19.9)  |
| ≥70000                               | 1956(24.1) | 389(21.6)  | 492(26.0)  | 591(25.7)  | 484(22.7)  |
| Missing                              | 1444(17.8) | 325(18.0)  | 371(19.6)  | 390(17.0)  | 358(16.8)  |
| Education level                      |            |            |            |            | <0.001     |
| Low (no qualifications)              | 1096(13.5) | 330(18.3)  | 248(13.1)  | 257(11.2)  | 261(12.2)  |
| Medium (certificate/diploma/trade)   | 5289(65.1) | 1128(62.6) | 1197(63.2) | 1530(66.6) | 1434(67.3) |
| High (university)                    | 1655(20.4) | 317(17.6)  | 426(22.5)  | 492(21.4)  | 420(19.7)  |
| Missing                              | 82(1.0)    | 26(1.4)    | 22(1.2)    | 17(0.7)    | 17(0.8)    |
| Body mass index (kg/m <sup>2</sup> ) |            |            |            |            | 0.002      |
| Underweight and normal weight        | 1092(13.4) | 209(11.6)  | 268(14.2)  | 310(13.5)  | 305(14.3)  |
| Overweight                           | 2496(30.7) | 523(29.0)  | 596(31.5)  | 709(30.9)  | 668(31.3)  |
| Obese                                | 4039(49.7) | 941(52.2)  | 918(48.5)  | 1137(49.5) | 1043(48.9) |
| Missing                              | 495(6.1)   | 128(7.1)   | 111(5.9)   | 140(6.1)   | 116(5.4)   |
| Hypertension                         |            |            |            |            | 0.85       |
| Yes                                  | 4791(59.0) | 1083(60.1) | 1086(57.4) | 1345(58.6) | 1277(59.9) |
| No                                   | 3331(41.0) | 718(39.9)  | 807(42.6)  | 951(41.4)  | 855(40.1)  |
| Cardiovascular disease               |            |            |            |            | 0.007      |
| Yes                                  | 1490(18.3) | 376(20.9)  | 341(18.0)  | 399(17.4)  | 374(17.5)  |
| No                                   | 6632(81.7) | 1425(79.1) | 1552(82.0) | 1897(82.6) | 1758(82.5) |
| Insulin treatment                    |            |            |            |            | 0.16       |
| Yes                                  | 1098(13.5) | 247(13.7)  | 221(11.7)  | 323(14.1)  | 307(14.4)  |
| No                                   | 7024(86.5) | 1554(86.3) | 1672(88.3) | 1973(85.9) | 1825(85.6) |
| Diabetes duration (years)            |            |            |            |            | 0.11       |
| 0-5                                  | 3536(43.5) | 722(40.1)  | 850(44.9)  | 1048(45.6) | 916(43.0)  |
| ≥5-10                                | 2020(24.9) | 467(25.9)  | 472(24.9)  | 563(24.5)  | 518(24.3)  |
| ≥10-20                               | 1678(20.7) | 404(22.4)  | 370(19.5)  | 424(18.5)  | 480(22.5)  |
| ≥20                                  | 526(6.5)   | 123(6.8)   | 106(5.6)   | 161(7.0)   | 136(6.4)   |
| Missing                              | 362(4.5)   | 85(4.7)    | 95(5.0)    | 100(4.4)   | 82(3.8)    |
| Family history of diabetes           |            |            |            |            | 0.74       |
| Yes                                  | 4257(52.4) | 940(52.2)  | 993(52.5)  | 1230(53.6) | 1094(51.3) |
| No                                   | 3865(47.6) | 861(47.8)  | 900(47.5)  | 1066(46.4) | 1038(48.7) |
| Current smoker                       |            |            |            |            | <0.001     |
| Yes                                  | 7270(89.5) | 1548(86.0) | 1706(90.1) | 2082(90.7) | 1934(90.7) |
| No                                   | 848(10.4)  | 252(14.0)  | 186(9.8)   | 214(9.3)   | 196(9.2)   |
| Missing                              | 3(0.0)     | 1(0.1)     | 1(0.1)     |            | 1(0.0)     |
| Alcohol drinker                      |            |            |            |            | <0.001     |

|                                   |            |           |            |            |            |        |
|-----------------------------------|------------|-----------|------------|------------|------------|--------|
| Yes                               | 4421(54.4) | 897(49.8) | 1003(53.0) | 1298(56.5) | 1223(57.4) |        |
| No                                | 3683(45.3) | 900(50.0) | 882(46.6)  | 996(43.4)  | 905(42.4)  |        |
| Missing                           | 18(0.2)    | 4(0.2)    | 8(0.4)     | 2(0.1)     | 4(0.2)     |        |
| Physical activity (sessions/week) |            |           |            |            |            | <0.001 |
| <5                                | 222(2.7)   | 69(3.8)   | 58(3.1)    | 48(2.1)    | 47(2.2)    |        |
| ≥5–9                              | 2031(25.0) | 547(30.4) | 455(24.0)  | 528(23.0)  | 501(23.5)  |        |
| ≥9–14                             | 2446(30.1) | 512(28.4) | 589(31.1)  | 716(31.2)  | 629(29.5)  |        |
| ≥14                               | 1682(20.7) | 351(19.5) | 407(21.5)  | 480(20.9)  | 444(20.8)  |        |
| Missing                           | 1741(21.4) | 322(17.9) | 384(20.3)  | 524(22.8)  | 511(24.0)  |        |

The quartiles of whole-meal bread consumption were as follows: Q1: 0-3; Q2: 4-9; Q3: 10-14; Q4: ≥15.

Supplementary table 3. Baseline foods consumption by quintiles of cheese consumption.

| Food             | Q1         | Q2        | Q3         | Q4        | P value    |
|------------------|------------|-----------|------------|-----------|------------|
| Breakfast cereal |            |           |            |           | 0.001      |
| Q1               | 1743(21.5) | 275(28.3) | 588(21.1)  | 264(20.3) | 616(20.1)  |
| Q2               | 1927(23.7) | 195(20.0) | 678(24.3)  | 338(26.0) | 716(23.4)  |
| Q3               | 1373(16.9) | 129(13.3) | 509(18.2)  | 228(17.6) | 507(16.6)  |
| Q4               | 3079(37.9) | 374(38.4) | 1015(36.4) | 469(36.1) | 1221(39.9) |
| Vegetables       |            |           |            |           | <0.001     |
| Q1               | 995(12.3)  | 166(17.1) | 373(13.4)  | 134(10.3) | 322(10.5)  |
| Q2               | 2020(24.9) | 231(23.7) | 728(26.1)  | 339(26.1) | 722(23.6)  |
| Q3               | 2473(30.4) | 289(29.7) | 878(31.5)  | 374(28.8) | 932(30.5)  |
| Q4               | 2634(32.4) | 287(29.5) | 811(29.1)  | 452(34.8) | 1084(35.4) |
| Fresh fruit      |            |           |            |           | <0.001     |
| Q1               | 655(8.1)   | 115(11.8) | 234(8.4)   | 82(6.3)   | 224(7.3)   |
| Q2               | 2569(31.6) | 305(31.3) | 892(32.0)  | 419(32.3) | 953(31.1)  |
| Q3               | 2810(34.6) | 307(31.6) | 987(35.4)  | 463(35.6) | 1053(34.4) |
| Q4               | 2088(25.7) | 246(25.3) | 677(24.3)  | 335(25.8) | 830(27.1)  |
| Poultry meat     |            |           |            |           | <0.001     |
| Q1               | 1426(17.6) | 201(20.7) | 490(17.6)  | 225(17.3) | 510(16.7)  |
| Q2               | 1433(17.6) | 184(18.9) | 547(19.6)  | 230(17.7) | 472(15.4)  |
| Q3               | 2455(30.2) | 260(26.7) | 845(30.3)  | 408(31.4) | 942(30.8)  |
| Q4               | 2808(34.6) | 328(33.7) | 908(32.5)  | 436(33.6) | 1136(37.1) |
| Fish/seafood     |            |           |            |           | 0.02       |
| Q1               | 935(11.5)  | 163(16.8) | 305(10.9)  | 129(9.9)  | 338(11.0)  |
| Q2               | 3086(38.0) | 305(31.3) | 1128(40.4) | 530(40.8) | 1123(36.7) |
| Q3               | 2238(27.6) | 255(26.2) | 764(27.4)  | 363(27.9) | 856(28.0)  |
| Q4               | 1863(22.9) | 250(25.7) | 593(21.3)  | 277(21.3) | 743(24.3)  |
| Red meat         |            |           |            |           | <0.001     |
| Q1               | 2024(24.9) | 294(30.2) | 743(26.6)  | 310(23.9) | 677(22.1)  |
| Q2               | 1397(17.2) | 159(16.3) | 558(20.0)  | 228(17.6) | 452(14.8)  |
| Q3               | 1775(21.9) | 182(18.7) | 621(22.3)  | 323(24.9) | 649(21.2)  |
| Q4               | 2926(36.0) | 338(34.7) | 868(31.1)  | 438(33.7) | 1282(41.9) |
| Processed meat   |            |           |            |           | <0.001     |
| Q1               | 1656(20.4) | 348(35.8) | 583(20.9)  | 223(17.2) | 502(16.4)  |
| Q2               | 2987(36.8) | 342(35.1) | 1186(42.5) | 495(38.1) | 964(31.5)  |
| Q3               | 1672(20.6) | 138(14.2) | 565(20.3)  | 307(23.6) | 662(21.6)  |
| Q4               | 1807(22.2) | 145(14.9) | 456(16.3)  | 274(21.1) | 932(30.5)  |

The quartiles of diet consumption for each food group were as follows: Red meat: Q1: 0; Q2: 1,2; Q3: 3; Q4: ≥4. Poultry, processed meat and fish/seafood: Q1: 0; Q2:1; Q3: 2; Q4: ≥3. Cheese: Q1: 0; Q2:1; Q3: 2,3; Q4: ≥4; Whole-meal bread: Q1: 0-3; Q2: 4-9; Q3: 10-14; Q4: ≥15.

Supplementary table 4. The baseline foods consumption by quintiles of whole-meal bread consumption.

| Food             | Q1         | Q2        | Q3        | Q4        | P value   |
|------------------|------------|-----------|-----------|-----------|-----------|
| Breakfast cereal |            |           |           |           | <0.001    |
| Q1               | 1743(21.5) | 525(29.2) | 399(21.1) | 401(17.5) | 418(19.6) |
| Q2               | 1927(23.7) | 467(25.9) | 491(25.9) | 483(21.0) | 486(22.8) |
| Q3               | 1373(16.9) | 247(13.7) | 355(18.8) | 430(18.7) | 341(16.0) |
| Q4               | 3079(37.9) | 562(31.2) | 648(34.2) | 982(42.8) | 887(41.6) |
| Vegetables       |            |           |           |           | <0.001    |
| Q1               | 995(12.3)  | 337(18.7) | 229(12.1) | 214(9.3)  | 215(10.1) |
| Q2               | 2020(24.9) | 473(26.3) | 501(26.5) | 562(24.5) | 484(22.7) |
| Q3               | 2473(30.4) | 494(27.4) | 564(29.8) | 726(31.6) | 689(32.3) |
| Q4               | 2634(32.4) | 497(27.6) | 599(31.6) | 794(34.6) | 744(34.9) |
| Fresh fruit      |            |           |           |           | <0.001    |
| Q1               | 655(8.1)   | 243(13.5) | 156(8.2)  | 122(5.3)  | 134(6.3)  |
| Q2               | 2569(31.6) | 635(35.3) | 597(31.5) | 695(30.3) | 642(30.1) |
| Q3               | 2810(34.6) | 523(29.0) | 656(34.7) | 890(38.8) | 741(34.8) |
| Q4               | 2088(25.7) | 400(22.2) | 484(25.6) | 589(25.7) | 615(28.8) |
| Poultry meat     |            |           |           |           | 0.18      |
| Q1               | 1426(17.6) | 325(18.0) | 299(15.8) | 395(17.2) | 407(19.1) |
| Q2               | 1433(17.6) | 375(20.8) | 341(18.0) | 360(15.7) | 357(16.7) |
| Q3               | 2455(30.2) | 526(29.2) | 576(30.4) | 720(31.4) | 633(29.7) |
| Q4               | 2808(34.6) | 575(31.9) | 677(35.8) | 821(35.8) | 735(34.5) |
| Fish/seafood     |            |           |           |           | <0.001    |
| Q1               | 935(11.5)  | 292(16.2) | 192(10.1) | 223(9.7)  | 228(10.7) |
| Q2               | 3086(38.0) | 715(39.7) | 707(37.3) | 853(37.2) | 811(38.0) |
| Q3               | 2238(27.6) | 425(23.6) | 512(27.0) | 661(28.8) | 640(30.0) |
| Q4               | 1863(22.9) | 369(20.5) | 482(25.5) | 559(24.3) | 453(21.2) |
| Red meat         |            |           |           |           | 0.006     |
| Q1               | 2024(24.9) | 471(26.2) | 502(26.5) | 546(23.8) | 505(23.7) |
| Q2               | 1397(17.2) | 293(16.3) | 350(18.5) | 416(18.1) | 338(15.9) |
| Q3               | 1775(21.9) | 340(18.9) | 468(24.7) | 532(23.2) | 435(20.4) |
| Q4               | 2926(36.0) | 697(38.7) | 573(30.3) | 802(34.9) | 854(40.1) |
| Processed meat   |            |           |           |           | <0.001    |
| Q1               | 1656(20.4) | 374(20.8) | 454(24.0) | 479(20.9) | 349(16.4) |
| Q2               | 2987(36.8) | 632(35.1) | 762(40.3) | 879(38.3) | 714(33.5) |
| Q3               | 1672(20.6) | 366(20.3) | 351(18.5) | 493(21.5) | 462(21.7) |
| Q4               | 1807(22.2) | 429(23.8) | 326(17.2) | 445(19.4) | 607(28.5) |

The quartiles of diet consumption for each food group were as follows: Red meat: Q1: 0; Q2: 1,2; Q3: 3; Q4:  $\geq 4$ . Poultry, processed meat and fish/seafood: Q1: 0; Q2: 1; Q3: 2; Q4:  $\geq 3$ . Cheese: Q1: 0; Q2: 1; Q3: 2,3; Q4:  $\geq 4$ ; Whole-meal bread: Q1: 0-3; Q2: 4-9; Q3: 10-14; Q4:  $\geq 15$ .
